# Supplementary material for: Nitrogen-doped graphene–poly(hydroxymethylated-3,4-ethylenedioxythiophene) nanocomposite electrochemical sensor for ultrasensitive determination of luteolin
Source: Royal Society of Chemistry journal article supplement (doi:10.1039/d2ra01669a), 2022-01-01
Supplement: d2ra01669a1.pdf [file d2ra01669a1.pdf]

## Supporting materials

# Nitrogen doped graphene–poly(hydroxymethylated-3,4-ethylenedioxythiophene) nanocomposites electrochemical sensor for ultrasensitive determination of luteolin

Shanshan Yu <sup>a</sup>, Yining Chen <sup>a</sup>, Ying Yang <sup>a</sup>, Yuanyuan Yao <sup>a,\*</sup> Haijun Song <sup>b,\*</sup>

<sup>a</sup> Jiaying Key Laboratory of Molecular Recognition and Sensing, College of Biological, Chemical Sciences and Engineering, Jiaying University, Jiaying 314001, PR China.

<sup>b</sup> College of Mechanical and Electrical Engineering, Jiaying University, Jiaying 314001, PR China.

\*Correspondence: yaoyuanyuan2007@163.com (Y.Y. Yao);  
songhaijun8837@126.com (H.J. Song).

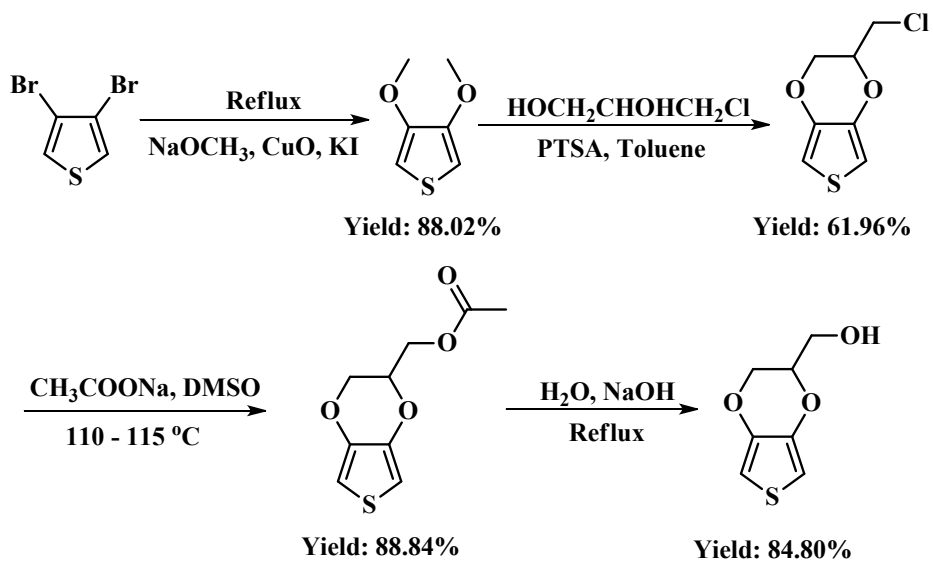

**Figure S1.** The synthesis route of EDOT-MeOH.

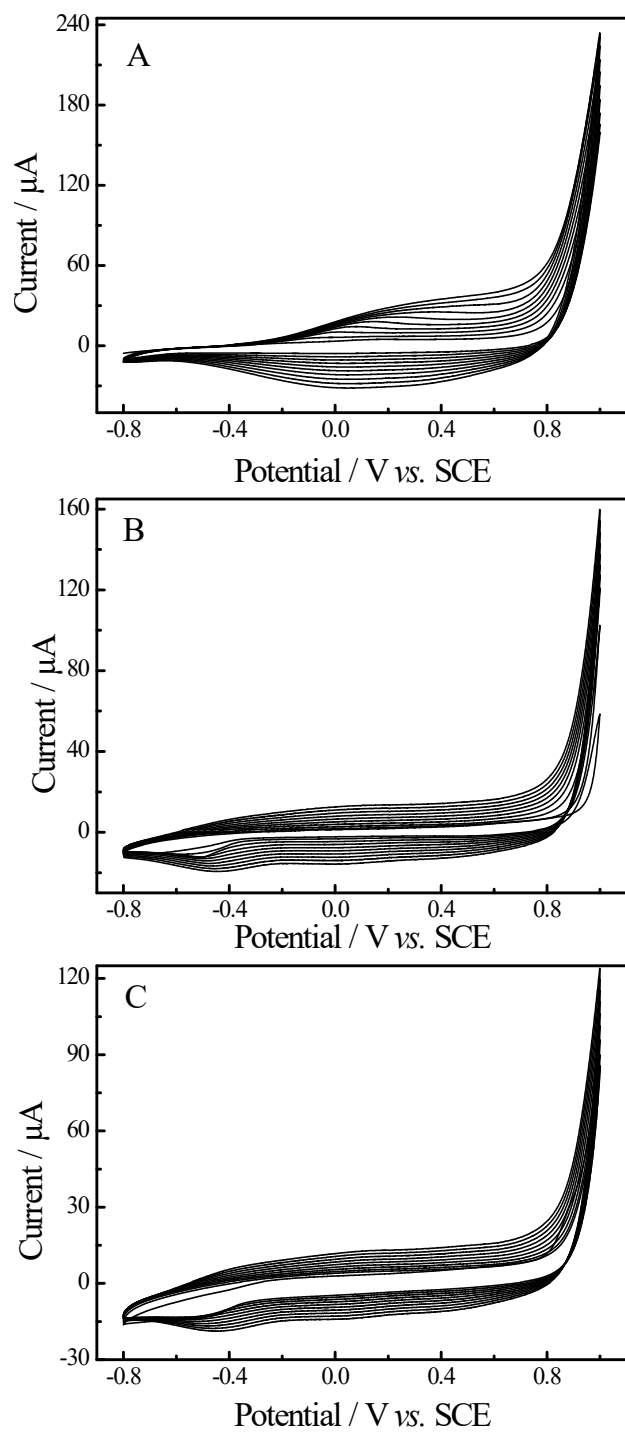

**Figure S2.** CVs of PEDOT/GCE (A), PEDOT-MeOH/GCE (B) and N-GR-PEDOT-MeOH/GCE (C) in 10 mM monomers containing 0.1 M LiClO<sub>4</sub>.

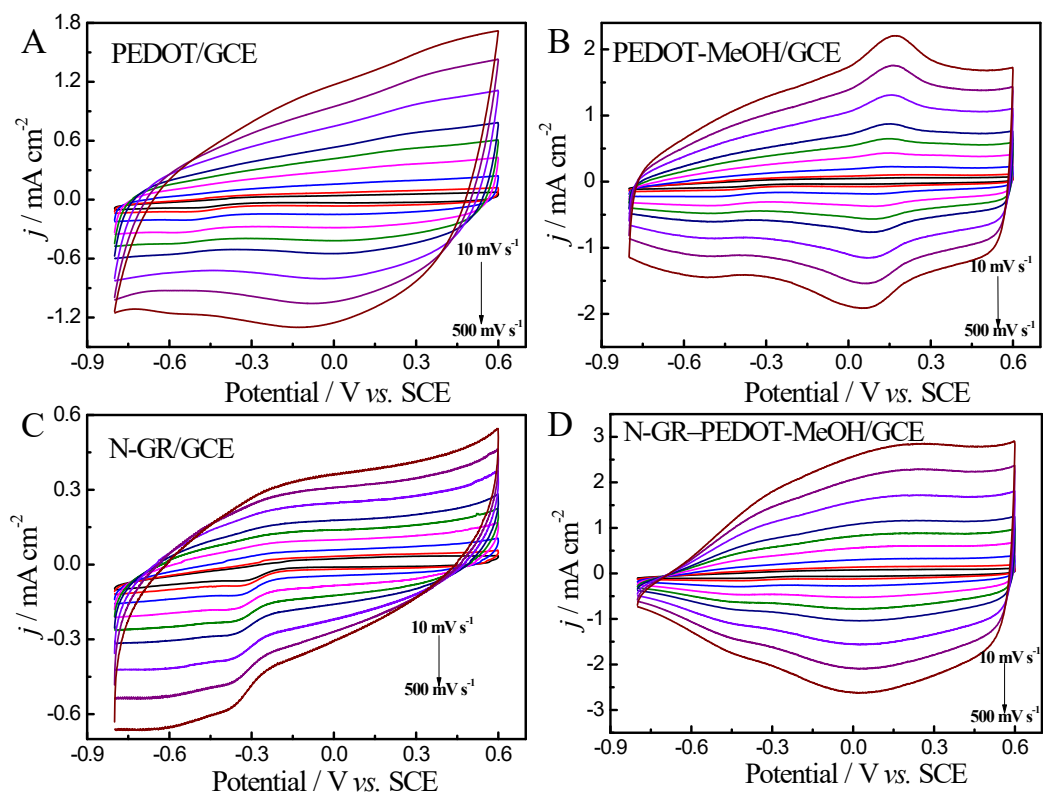

**Figure S3.** CVs of PEDOT/GCE (a), PEDOT-MeOH/GCE (b), N-GR (c), and N-GR-PEDOT-MeOH/GCE (d) (e) in 1 mM  $[\text{Fe}(\text{CN})_6]^{3-}$  with different scan rates.

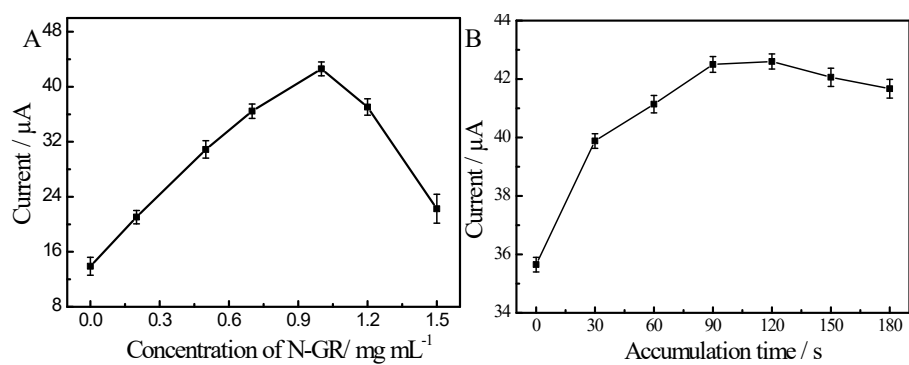

**Figure S4.** Effect of N-GR concentration and accumulation time on the current response of 50  $\mu\text{M}$  luteolin in 0.1 M PBS (pH 7.0).

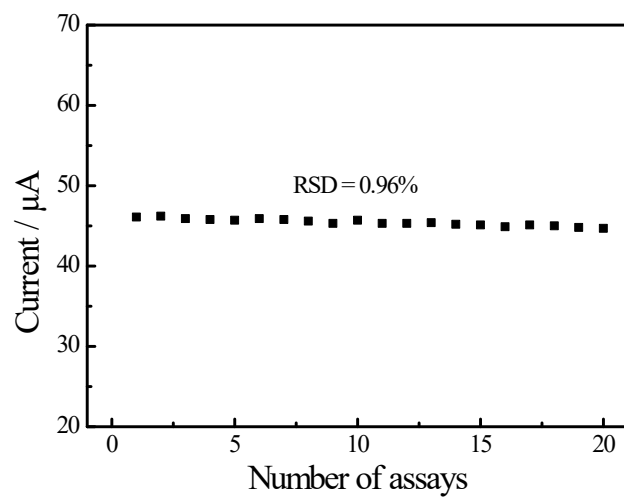

**Figure S5.** Current responses of 50  $\mu\text{M}$  luteolin in 0.1 M PBS (pH 7.0) based on N-GR-PEDOT-MeOH/GCE for 20 successive assays with the same modified electrode.

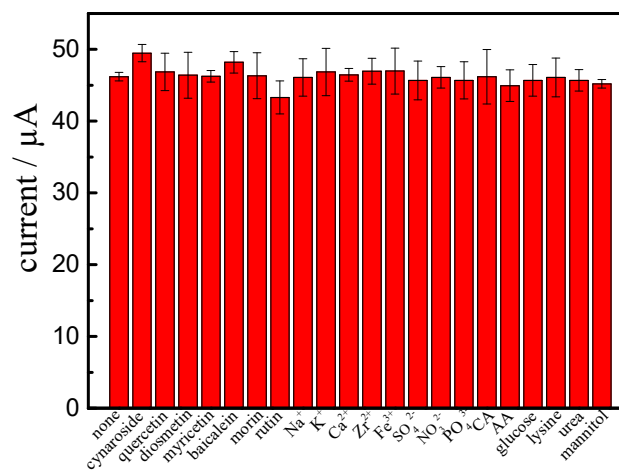

**Figure S6.** Effect of some possible interfering substances on the determination of 50  $\mu\text{M}$  luteolin in 0.1 M PBS (pH 7.0) based on N-GR-PEDOT-MeOH/GCE.

**Table S1** Comparison of the constructed electrode with other reported electrodes for the determination of luteolin.

| Electrodes                                                | Accumulation potential (V) | Accumulation time | Linear range ( $\mu\text{M}$ ) | Limit of detection (nM) | Real sample                                               | Ref.      |
|-----------------------------------------------------------|----------------------------|-------------------|--------------------------------|-------------------------|-----------------------------------------------------------|-----------|
| MOF-525/MPC <sup>a</sup>                                  | 0.1                        | 350 s             | 0.005-5                        | 0.35                    | Serum and urine                                           | [9]       |
| MoO <sub>3</sub> -Polypyrrole Nanowires/MWCNTs            | —                          | 1 min             | 0.0001-10                      | 0.03                    | Chrysanthemum tea                                         | [10]      |
| Mxene/ZIF-67/CNTs                                         | —                          | 280 s             | 0.0001-1                       | 0.03                    | Grape juice drink                                         | [11]      |
| poly alizarin red/f-MWCNTs <sup>b</sup>                   | —                          | —                 | 0.5-45                         | 170                     | Duyiwei capsules, serum                                   | [13]      |
| ZrO <sub>2</sub> /CS <sup>c</sup> /rGOA <sup>d</sup> /GCE | —                          | 5 min             | 0.005-1                        | 1.0                     | Peach juice, red wine                                     | [14]      |
| Au/Pd/rGO/GCE                                             | —                          | —                 | 0.01-80                        | 0.98                    | <i>Chrysanthemums, Peanut shells</i>                      | [15]      |
| AuNFs-BPC <sup>e</sup> /GCE                               | 0                          | 300 s             | 0.15-10                        | —                       | Capsule, human urine                                      | [16]      |
| PEDOT/EDTA-Ni/GCE                                         | —                          | —                 | 0.001-10                       | 0.3                     | <i>Lamiophlomis rotata</i> Kudo                           | [17]      |
| In <sub>2</sub> O <sub>3</sub> NPs/CPE <sup>f</sup>       | -0.2                       | 60 s              | 0.00998-0.0884                 | 0.199                   | Human urine and serum, <i>Thyme</i>                       | [18]      |
| N-GR-PEDOT-MeOH/GCE                                       | 0                          | 120 s             | 0.005-10.06                    | 0.05                    | <i>Thyme, Lonicera japonica, Lamiophlomis rotata</i> Kudo | This work |

<sup>a</sup> Porphyrin-based zirconium MOF macroporous carbon, <sup>b</sup> carboxylic acid group functionalized multiwall carbon nanotube, <sup>c</sup> chitosan, <sup>d</sup> reduced graphene oxide aerogel, <sup>e</sup> biomass-derived porous carbon, <sup>f</sup> carbon paste electrode.
